# Supplementary material for: Facile and efficient preparation of organoimido derivatives of [Mo6O19]2− using accelerated reactions in Leidenfrost droplets
Source: Royal Society of Chemistry journal article supplement (doi:10.1039/d0an00578a), 2020-01-01
Supplement: d0an00578a1.pdf [file d0an00578a1.pdf]

Supporting Information

**Facile and Efficient Preparation of Organoimido Derivatives of  $[\text{Mo}_6\text{O}_{19}]^{2-}$  using Accelerated Reactions in Leidenfrost Droplets**

Jie Cao\*,<sup>[a]</sup> QianQian Wang,<sup>[a,b]</sup> ShuQi An,<sup>[a]</sup> ShiFang Lu,<sup>[a]</sup> QingZhu Jia<sup>[a]</sup>

- a. Key Laboratory of Cluster Science, Ministry of Education of China; Beijing Key Laboratory of Photoelectronic/Electrophotonic Conversion Materials; School of Chemistry, Beijing Institute of Technology, Beijing 100081, China
- b. Laboratory Medicine Department, Fenyang College of Shanxi Medical University, Fenyang 032200, China

\*Corresponding author (email: jcao@bit.edu.cn.)

## Table of Contents

**S1:** Further description of Leidenfrost experiment

**Figure S1** Real-time ESI monitoring on the reaction of  $1 + 2 \rightarrow 6$  performed in Leidenfrost droplet (left panel) and bulk-phase solution (right panel) at different time intervals. The solid red triangle indicates the product **6**. The ESI-MS spectrum of the re-dissolved precipitate, isolated from the reaction solution upon completion, in  $\text{CH}_3\text{CN}$  was also shown at the bottom of right panel.

**Figure S2** Real-time ESI monitoring on the reaction of  $1 + 3 \rightarrow 7$  performed in Leidenfrost droplet (left panel) and bulk-phase solution (right panel) at different time intervals. The solid red triangle indicates the product **7**. The ESI-MS spectrum of the re-dissolved precipitate, isolated from the reaction solution upon completion, in  $\text{CH}_3\text{CN}$  was also shown at the bottom of right panel.

**Figure S3** Real-time ESI monitoring on the reaction of  $1 + 4 \rightarrow 8$  performed in Leidenfrost droplet (left panel) and bulk-phase solution (right panel) at different time intervals. The solid red triangle indicates the product **8**. The ESI-MS spectrum of the re-dissolved precipitate, isolated from the reaction solution upon completion, in  $\text{CH}_3\text{CN}$  was also shown at the bottom of right panel.

**Figure S4** Real-time ESI monitoring on the reaction of  $1 + 5 \rightarrow 9$  performed in Leidenfrost droplet (left panel) and bulk-phase solution (right panel) at different time intervals. The solid red triangle indicates the product **9**. The ESI-MS spectrum of the re-dissolved precipitate, isolated from the reaction solution upon completion, in  $\text{CH}_3\text{CN}$  was also shown at the bottom of right panel.

**Figure S5** Conversion ratio (*CR*) over time for the reaction of  $1 + 3 \rightarrow 7$  in (a) bulk and (b) constant volume 500- $\mu\text{L}$  Leidenfrost droplet reactor. Mass spectra for similar conversion ratios were given underneath.

**Figure S6** Conversion ratio (*CR*) over time for the reaction of **1 + 4** → **8** in (a) bulk and (b) constant volume 500- $\mu$ L Leidenfrost droplet reactor. Mass spectra for similar conversion ratios were given underneath.

**Figure S7** Conversion ratio (*CR*) over time for the reaction of **1 + 5** → **9** in (a) bulk and (b) constant volume 500- $\mu$ L Leidenfrost droplet reactor. Mass spectra for similar conversion ratios were given underneath.

**S1:** Further description of Leidenfrost experiment

The volume of Leidenfrost droplet was kept constant by monitoring the diameter of the droplet over the course of reaction using a scale bar. The scale bar is a ruler with a magnifying glass. The uncertainty associated with the determination of droplet size is ca.  $\pm 1$  mm (in diameter). The levitated droplet only moves within very limited space (not turbulent) during the reaction. The addition rate of the reaction mixture was carefully adjusted so that the volume of droplet can keep approximately the same which was constantly monitored by a scale bar. It is one source of error involved in the final result.

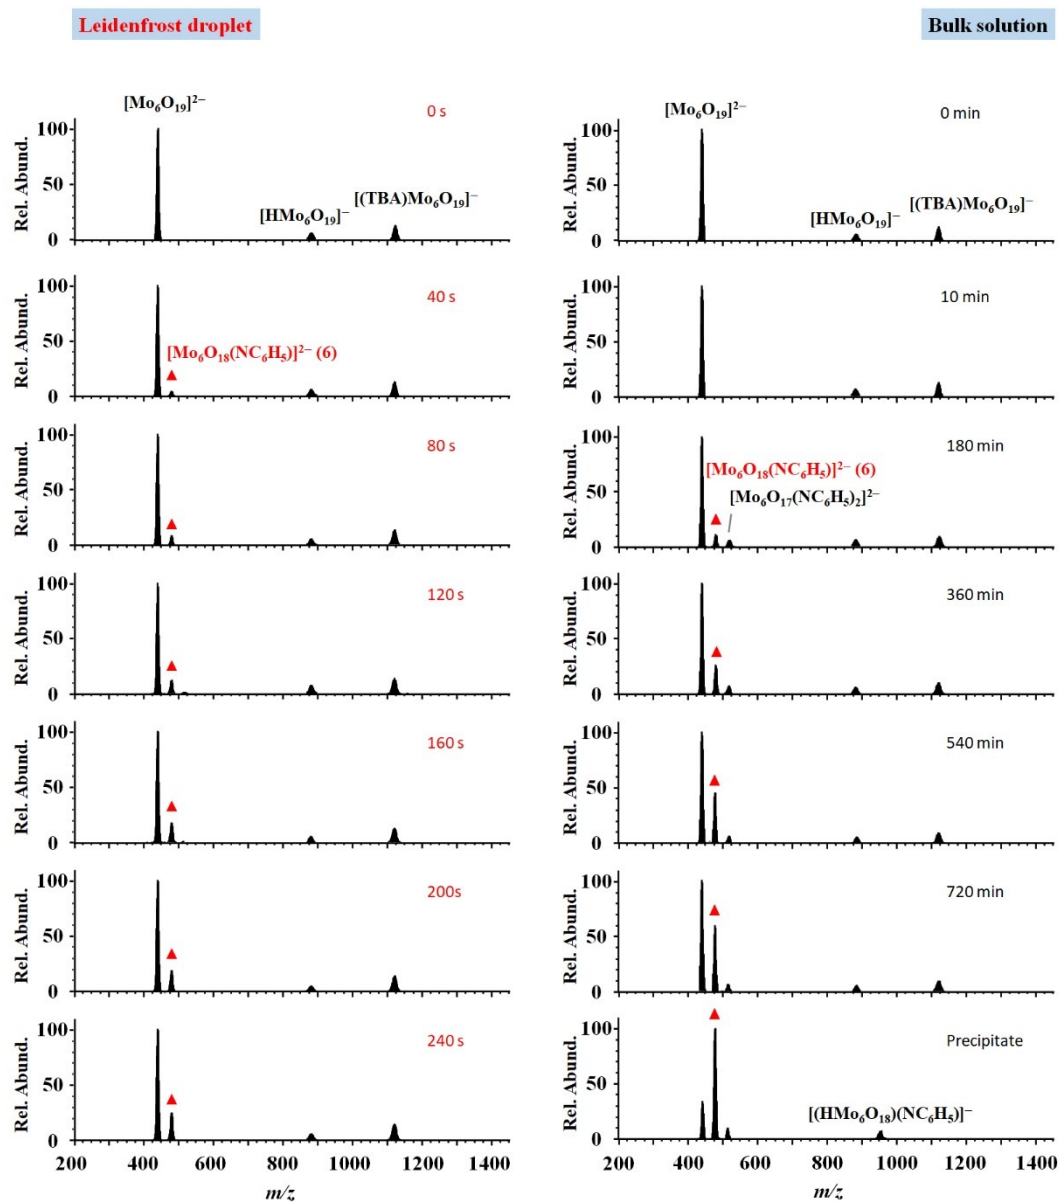

**Figure S1.** Real-time ESI monitoring on the reaction of **1** + **2**  $\rightarrow$  **6** performed in Leidenfrost droplet (left panel) and bulk-phase solution (right panel) at different time intervals. The solid red triangle indicates the product **6**. The ESI-MS spectrum of the re-dissolved precipitate, isolated from the reaction solution upon completion, in  $\text{CH}_3\text{CN}$  was also shown at the bottom of right panel.

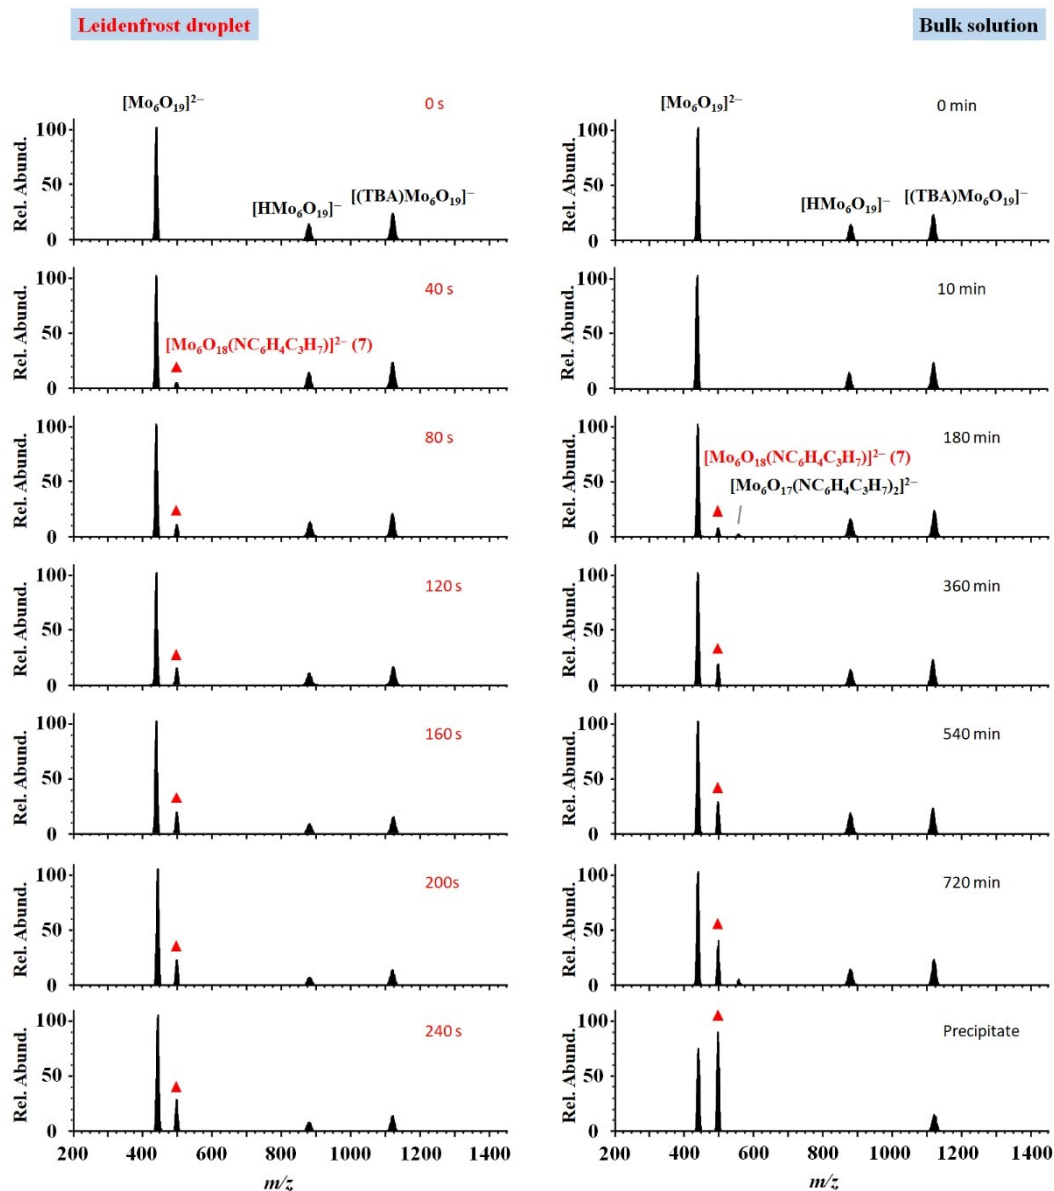

**Figure S2.** Real-time ESI monitoring on the reaction of  $1 + 3 \rightarrow 7$  performed in Leidenfrost droplet (left panel) and bulk-phase solution (right panel) at different time intervals. The solid red triangle indicates the product 7. The ESI-MS spectrum of the re-dissolved precipitate, isolated from the reaction solution upon completion, in  $\text{CH}_3\text{CN}$  was also shown at the bottom of right panel.

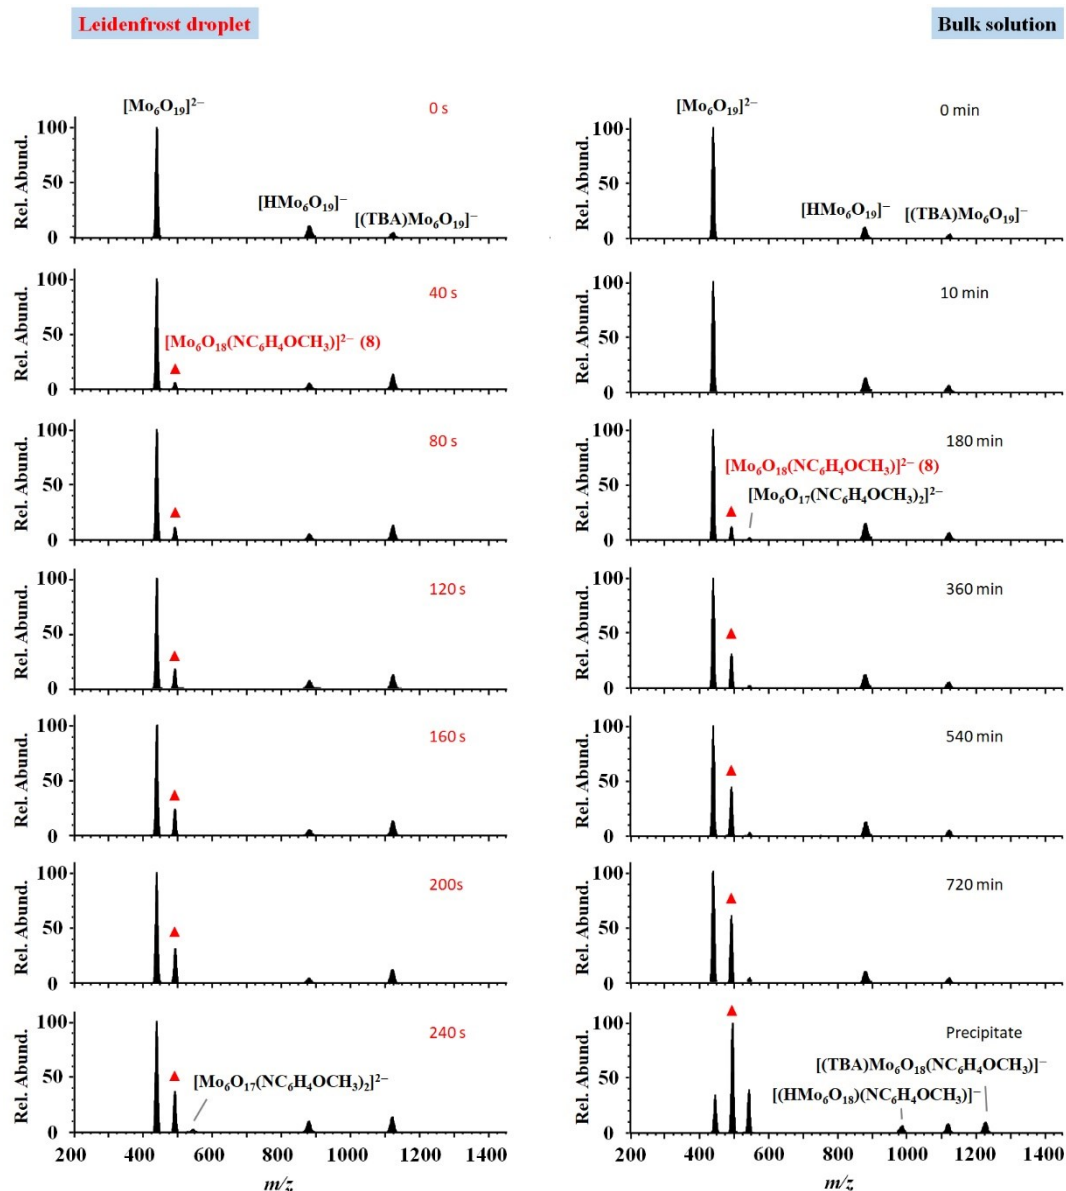

**Figure S3.** Real-time ESI monitoring on the reaction of  $1 + 4 \rightarrow 8$  performed in Leidenfrost droplet (left panel) and bulk-phase solution (right panel) at different time intervals. The solid red triangle indicates the product **8**. The ESI-MS spectrum of the re-dissolved precipitate, isolated from the reaction solution upon completion, in  $\text{CH}_3\text{CN}$  was also shown at the bottom of right panel.

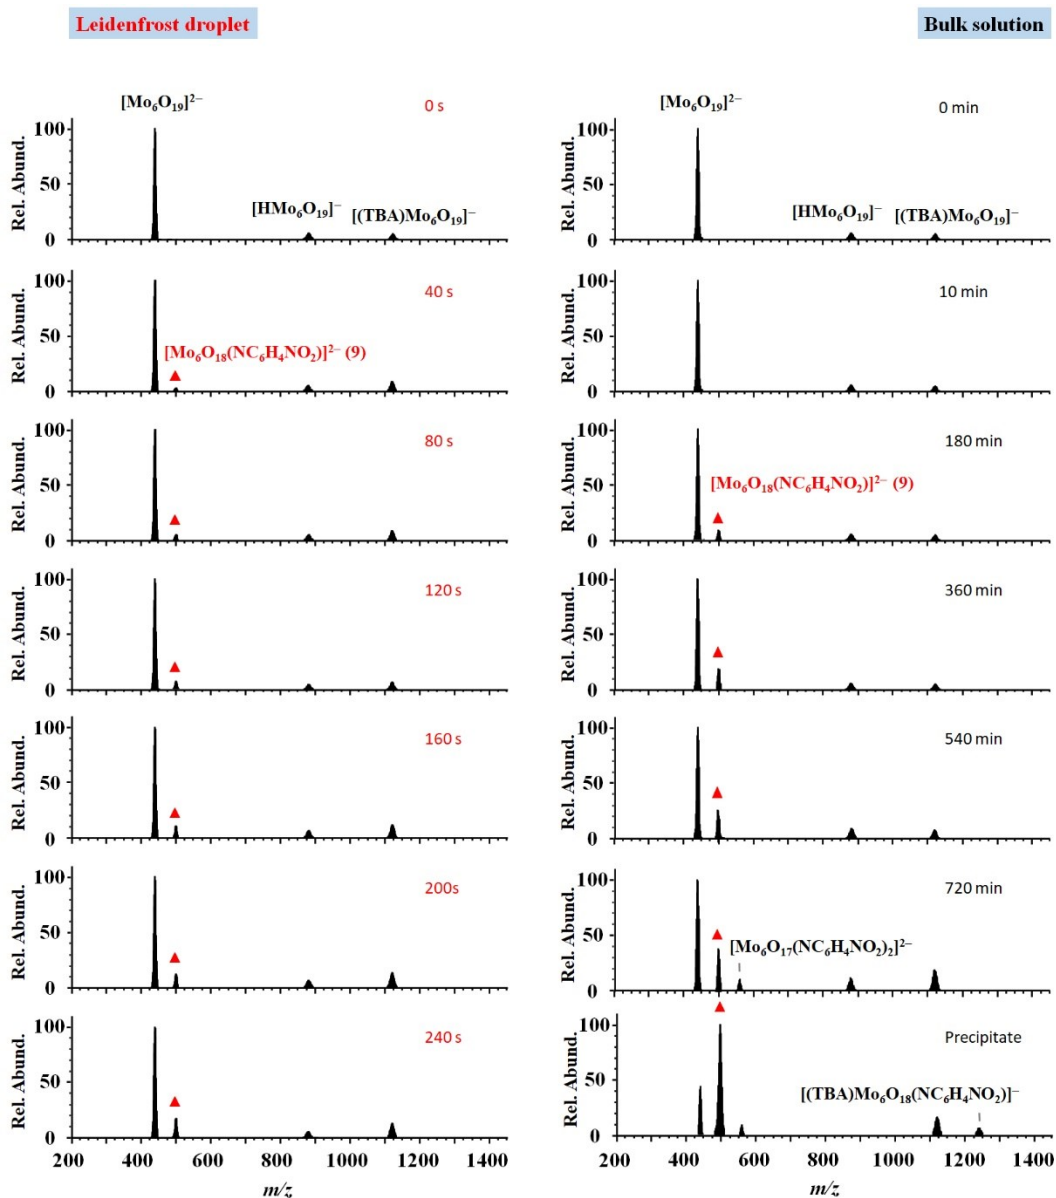

**Figure S4.** Real-time ESI monitoring on the reaction of **1** + **5** → **9** performed in Leidenfrost droplet (left panel) and bulk-phase solution (right panel) at different time intervals. The solid red triangle indicates the product **9**. The ESI-MS spectrum of the re-dissolved precipitate, isolated from the reaction solution upon completion, in  $\text{CH}_3\text{CN}$  was also shown at the bottom of right panel.



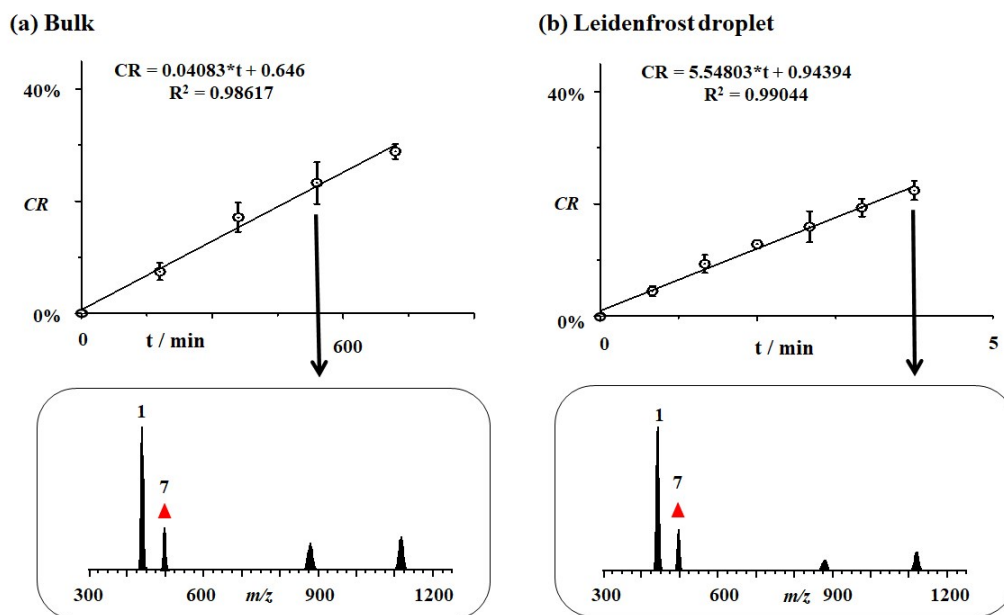

**Figure S5.** Conversion ratio ( $CR$ ) over time for the reaction of  $1 + 3 \rightarrow 7$  in (a) bulk and (b) constant volume 500- $\mu\text{L}$  Leidenfrost droplet reactor. Mass spectra for similar conversion ratios were given underneath.

(a) Bulk

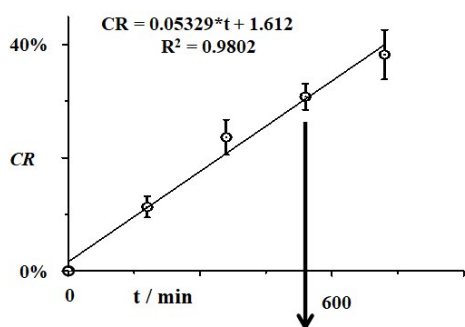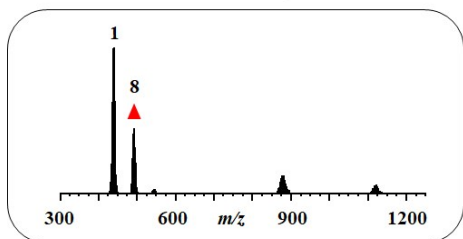

(b) Leidenfrost droplet

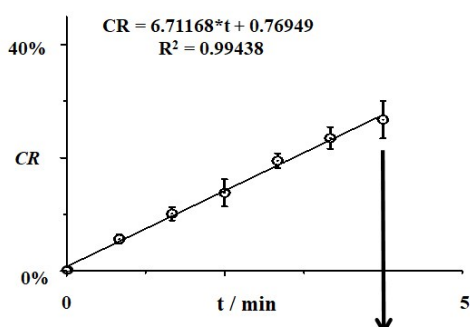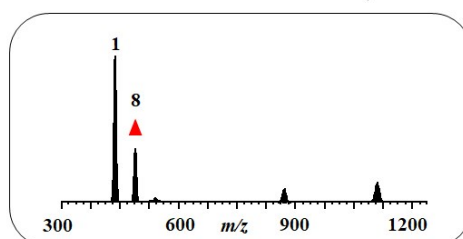

**Figure S6.** Conversion ratio (CR) over time for the reaction of **1** + **4**  $\rightarrow$  **8** in (a) bulk and (b) constant volume 500- $\mu$ L Leidenfrost droplet reactor. Mass spectra for similar conversion ratios were given underneath.

(a) Bulk

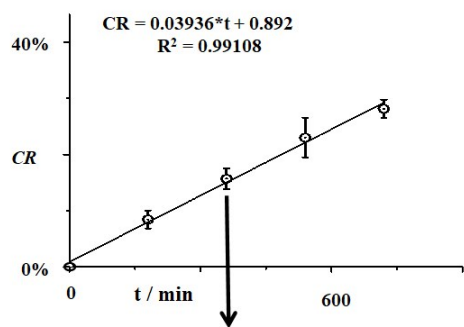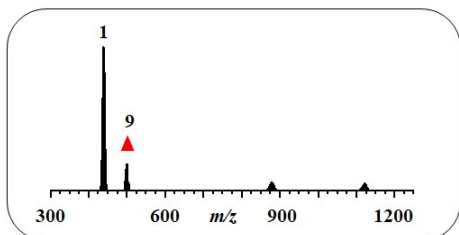

(b) Leidenfrost droplet

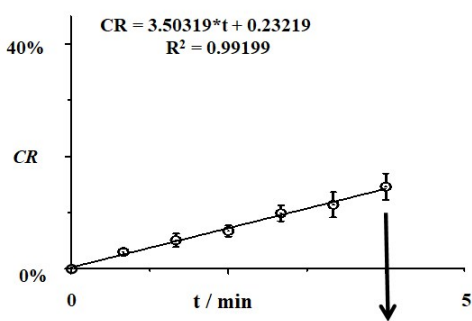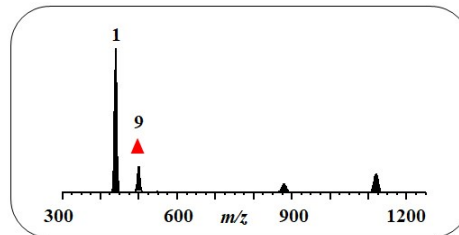

**Figure S7.** Conversion ratio (*CR*) over time for the reaction of **1** + **5** → **9** in (a) bulk and (b) constant volume 500- $\mu$ L Leidenfrost droplet reactor. Mass spectra for similar conversion ratios were given underneath.
